# Supplementary material for: Abiotic, present-day and historical effects on species, functional and phylogenetic diversity in dry grasslands of different age
Source: PubMed Central journal article supplement (PMC6793948; doi:10.1371/journal.pone.0223826), 2019-10-15
Supplement: pone.0223826.s008.pdf [file pone.0223826.s008.pdf]

1 **S1 Table. Values for landscape-scale variables examined in this study for the four time-periods for dry**  
 2 **grasslands and potential grassland habitat (PGH).**

3

|                             | 1843   | 1954   | 1980   | 2009      |
|-----------------------------|--------|--------|--------|-----------|
| Dry grasslands              |        |        |        |           |
| No. patches                 | 131    | 137    | 216    | 216 (56)* |
| Mean isolation**            | -3.12  | -2.79  | -3.55  | -2.18     |
| Potential grassland habitat |        |        |        |           |
| No. PGH                     | 4209   | 3404   | 3053   | --        |
| No. pastures                | 3815   | 2777   | 762    | --        |
| No. meadows                 | 340    | 308    | 102    | --        |
| No. abandoned               | 54     | 319    | 2189   | --        |
| Area pastures (Ha)          | 255.82 | 165.90 | 315.34 | --        |
| Area meadows (Ha)           | 41.22  | 45.74  | 53.61  | --        |
| Area abandoned (Ha)         | 4.44   | 8.50   | 156.46 | --        |
| PGH area total (Ha)         | 301.5  | 220.14 | 585.8  | --        |

4

5 Habitat isolation is calculated according to Eq. 1 and expressed as a mean per focal patch (values were higher for more  
 6 isolated sites, when the source dry grasslands were smaller). Total habitat amount is expressed as the sum of the area of  
 7 patches within 500 m buffer. \*Total patches calculated as historical dry grasslands + (new patches). \*\* Dry grassland  
 8 isolation to PGH in historical times (1843, 1954, 1980) and dry grassland isolation in present-day landscapes.

9
