# Supplementary material for: Abiotic, present-day and historical effects on species, functional and phylogenetic diversity in dry grasslands of different age
Source: PubMed Central journal article supplement (PMC6793948; doi:10.1371/journal.pone.0223826), 2019-10-15
Supplement: pone.0223826.s009.pdf [file pone.0223826.s009.pdf]

1 **S2 Table. List of species used in this study.** <sup>1</sup>Species with mean trait value for specific leaf area.

2 <sup>2</sup>Species with mean trait value for seed bank longevity. The taxonomy and nomenclature of species in this  
3 paper follow Tutin, T. G et al. (Eds.) 1964-1983. Flora Europaea. Cambridge, UK: Cambridge University  
4 Press.

5

| species                                         | Old patches | New patches |
|-------------------------------------------------|-------------|-------------|
| <i>Agrimonia eupatoria</i>                      | 203         | 51          |
| <i>Anemone sylvestris</i>                       | 40          | 2           |
| <i>Anthericum ramosum</i>                       | 18          | NA          |
| <i>Anthyllis vulneraria</i>                     | 64          | 3           |
| <i>Artemisia campestris</i>                     | 5           | NA          |
| <i>Asperula cynanchica</i>                      | 44          | 1           |
| <i>Asperula tinctoria</i>                       | 23          | NA          |
| <i>Aster amellus</i>                            | 24          | 2           |
| <i>Aster linosyris</i>                          | 15          | NA          |
| <i>Astragalus cicer</i> <sup>2</sup>            | 86          | 23          |
| <i>Astragalus glycyphyllos</i>                  | 142         | 33          |
| <i>Brachypodium pinnatum</i>                    | 187         | 42          |
| <i>Briza media</i>                              | 110         | 17          |
| <i>Bromus erectus</i>                           | 105         | 14          |
| <i>Bupleurum falcatum</i>                       | 158         | 29          |
| <i>Campanula glomerata</i>                      | 1           | NA          |
| <i>Campanula rotundifolia</i>                   | 6           | 2           |
| <i>Carex flacca</i>                             | 100         | 13          |
| <i>Carex humilis</i>                            | 45          | 1           |
| <i>Carex tomentosa</i>                          | 63          | 9           |
| <i>Carlina vulgaris</i>                         | 65          | 13          |
| <i>Centaurea jacea</i>                          | 166         | 36          |
| <i>Centaurea scabiosa</i>                       | 156         | 31          |
| <i>Centaurea stoebe</i>                         | 6           | 1           |
| <i>Cirsium acaule</i>                           | 74          | 6           |
| <i>Cirsium eriophorum</i>                       | 20          | 10          |
| <i>Cirsium pannonicum</i> <sup>2</sup>          | 9           | NA          |
| <i>Coronilla vaginalis</i> <sup>2</sup>         | 3           | NA          |
| <i>Dianthus carthusianorum</i>                  | 36          | 7           |
| <i>Eryngium campestre</i>                       | 115         | 15          |
| <i>Euphrasia rostkoviana</i> <sup>1</sup>       | 11          | 3           |
| <i>Falcaria vulgaris</i>                        | 107         | 28          |
| <i>Festuca rupicola</i>                         | 177         | 41          |
| <i>Filipendula vulgaris</i>                     | 8           | 1           |
| <i>Fragaria viridis</i>                         | 188         | 45          |
| <i>Galium verum</i>                             | 163         | 43          |
| <i>Genista tinctoria</i>                        | 26          | 2           |
| <i>Gentiana cruciata</i> <sup>1</sup>           | 47          | 13          |
| <i>Geranium sanguineum</i>                      | 23          | 2           |
| <i>Globularia punctata</i> <sup>2</sup>         | 15          | NA          |
| <i>Gymnadenia conopsea</i>                      | 3           | NA          |
| <i>Helianthemum grandiflorum</i> <sup>1,2</sup> | 52          | 6           |
| <i>Hieracium pilosella</i>                      | 65          | 11          |
| <i>Hypericum perforatum</i>                     | 154         | 46          |
| <i>Inula hirta</i>                              | 10          | 1           |
| <i>Inula salicina</i>                           | 159         | 40          |
| <i>Knautia arvensis</i>                         | 190         | 49          |
| <i>Koeleria pyramidata</i>                      | 53          | 5           |

|                                             |     |    |
|---------------------------------------------|-----|----|
| <i>Laserpitium latifolium</i>               | 2   | NA |
| <i>Lathyrus pratensis</i>                   | 51  | 20 |
| <i>Leontodon hispidus</i>                   | 119 | 28 |
| <i>Leucanthemum vulgare</i>                 | 68  | 11 |
| <i>Linum catharticum</i>                    | 159 | 36 |
| <i>Linum flavum</i> <sup>2</sup>            | 10  | NA |
| <i>Linum tenuifolium</i>                    | 15  | NA |
| <i>Listera ovata</i>                        | 10  | NA |
| <i>Lotus corniculatus</i>                   | 185 | 38 |
| <i>Medicago falcata</i> <sup>1</sup>        | 93  | 10 |
| <i>Melampyrum arvense</i>                   | 22  | 3  |
| <i>Melampyrum cristatum</i>                 | 1   | NA |
| <i>Melampyrum nemorosum</i>                 | 13  | 2  |
| <i>Onobrichis viciifolia</i>                | 10  | NA |
| <i>Ononis spinosa</i>                       | 60  | 1  |
| <i>Origanum vulgare</i>                     | 112 | 33 |
| <i>Peucedanum cervaria</i>                  | 41  | 2  |
| <i>Peucedanum oreoselinum</i>               | 11  | NA |
| <i>Pimpinella saxifraga</i>                 | 115 | 22 |
| <i>Plantago lanceolata</i>                  | 148 | 34 |
| <i>Plantago media</i>                       | 160 | 27 |
| <i>Platanthera bifolia</i>                  | 16  | 2  |
| <i>Potentilla arenaria</i>                  | 33  | 2  |
| <i>Potentilla heptaphylla</i>               | 95  | 19 |
| <i>Primula veris</i>                        | 75  | 14 |
| <i>Prunella grandiflora</i>                 | 79  | 6  |
| <i>Prunella vulgaris</i>                    | 77  | 17 |
| <i>Pulsatilla pratensis</i> <sup>2</sup>    | 3   | NA |
| <i>Salvia nemorosa</i> <sup>2</sup>         | 39  | 3  |
| <i>Salvia pratensis</i>                     | 161 | 24 |
| <i>Salvia verticillata</i> <sup>2</sup>     | 122 | 24 |
| <i>Sanguisorba minor</i>                    | 165 | 30 |
| <i>Scabiosa canescens</i>                   | 1   | NA |
| <i>Scabiosa ochroleuca</i>                  | 129 | 19 |
| <i>Scorzonera hispanica</i> <sup>2</sup>    | 4   | NA |
| <i>Securigera varia</i>                     | 197 | 49 |
| <i>Seseli hippomarathrum</i> <sup>1,2</sup> | 7   | NA |
| <i>Sesleria albicans</i>                    | 20  | NA |
| <i>Silene vulgaris</i>                      | 88  | 26 |
| <i>Solidago virgaurea</i>                   | 24  | 2  |
| <i>Stachys recta</i>                        | 88  | 14 |
| <i>Tanacetum corymbosum</i>                 | 37  | 6  |
| <i>Teucrium chamaedris</i>                  | 56  | 5  |
| <i>Thesium linophyllum</i>                  | 4   | NA |
| <i>Thymus praecox</i>                       | 74  | 4  |
| <i>Trifolium medium</i>                     | 150 | 33 |
| <i>Trifolium montanum</i>                   | 40  | 5  |
| <i>Veronica austriaca</i> <sup>1</sup>      | 27  | 6  |
| <i>Vicia cracca</i>                         | 125 | 29 |
| <i>Vicia sepium</i>                         | 58  | 14 |
| <i>Viola hirta</i>                          | 53  | 7  |
