# Supplementary material for: Abiotic, present-day and historical effects on species, functional and phylogenetic diversity in dry grasslands of different age
Source: PubMed Central journal article supplement (PMC6793948; doi:10.1371/journal.pone.0223826), 2019-10-15
Supplement: pone.0223826.s010.pdf [file pone.0223826.s010.pdf]

**S3 Table. Minimum, maximum and mean values ( $\pm$  standard error) for abiotic variables for the old dry grasslands.**

|           | MIN     | MAX     | MEAN    | SE    | threshold |
|-----------|---------|---------|---------|-------|-----------|
| TWI       | 5.37    | 16.32   | 8.17    | 0.032 | 16.34761  |
| Slope     | 0.03    | 32.04   | 12.38   | 0.021 | 0.01167   |
| Elevation | 14.41   | 217.40  | 70.85   | 0.287 | 14.12752  |
| PDSI_Dec  | 78.02   | 364.63  | 205.06  | 0.241 | 364.876   |
| PDSI_Jan  | 146.83  | 647.12  | 385.55  | 0.404 | 647.532   |
| PDSI_Feb  | 529.35  | 1658.27 | 1122.64 | 0.874 | 1659.142  |
| PDSI_Mar  | 1469.30 | 3068.80 | 2358.69 | 1.263 | 3070.069  |
| PDSI_Ap   | 2959.51 | 4534.27 | 3936.82 | 1.290 | 4535.568  |
| PDSI_May  | 4128.40 | 5490.64 | 5094.62 | 1.043 | 5491.687  |
| PDSI_Jun  | 4607.36 | 5881.48 | 5537.23 | 0.900 | 5882.387  |

TWI, topographic wetness index; PDSI\_Dec, potential direct solar irradiation in December; PDSI\_Jan, potential direct solar irradiation in January; PDSI\_Feb, potential direct solar irradiation in February; PDSI\_Mar, potential direct solar irradiation in March; PDSI\_Ap, potential direct solar irradiation in April; PDSI\_May, potential direct solar irradiation in May; PDSI\_June, potential direct solar irradiation in June.
